# Supplementary material
Source: Research Square preprint supplement (doi:10.21203/rs.3.rs-9200599/v1)
Supplement: Supplementary file 1 [file 0943c0dbb231ca2507ce38e1.pdf]

**PARECER CONSUBSTANCIADO DO CEP**

**DADOS DO PROJETO DE PESQUISA**

**Título da Pesquisa:** AVALIAÇÃO TRIDIMENSIONAL DOS CÔNDILOS MANDIBULARES EM TOMOGRAFIA DE PACIENTES COM MÁ-OCCLUSÃO CLASSE III

**Pesquisador:** ULISSES SIMONCELLI

**Área Temática:**

**Versão:** 2

**CAAE:** 93936825.3.0000.5374

**Instituição Proponente:** CENTRO DE PESQUISAS ODONTOLÓGICAS SÃO LEOPOLDO MANDIC SS

**Patrocinador Principal:** Financiamento Próprio

**DADOS DO PARECER**

**Número do Parecer:** 8.163.308

**Apresentação do Projeto:**

Vide parecer anterior

**Objetivo da Pesquisa:**

Vide parecer anterior

**Avaliação dos Riscos e Benefícios:**

Vide parecer anterior

**Comentários e Considerações sobre a Pesquisa:**

Vide parecer anterior

**Considerações sobre os Termos de apresentação obrigatória:**

Vide parecer anterior

**Conclusões ou Pendências e Lista de Inadequações:**

Apreciando-se a carta-resposta e os documentos ajustados apresentados pelo pesquisador quanto às pendências apontadas no parecer anterior, constatou-se:

1) Quanto à incongruência temporal do cronograma de execução da pesquisa:

O pesquisador esclareceu adequadamente que não houve início da coleta de dados antes da submissão e aprovação ética do projeto, informando que a data anteriormente indicada correspondia apenas a uma previsão inicial inserida de forma equivocada. O cronograma foi

**Endereço:** Rua Waldemar Blatkauskas, 72

**Bairro:** Swift

**CEP:** 13.041-545

**UF:** SP

**Município:** CAMPINAS

**Telefone:** (19)3211-3601

**E-mail:** cep@slmandic.edu.br

Continuação do Parecer: 8.163.308

devidamente corrigido, com adequação das datas para período posterior à aprovação pelo CEP, atendendo à exigência ética de que nenhuma etapa envolvendo dados de participantes seja iniciada sem parecer favorável.

2) Quanto à ausência de detalhamento sobre controle de acesso, armazenamento e sigilo dos dados: Verificou-se que o pesquisador incluiu descrição detalhada e adequada acerca dos mecanismos de controle de acesso aos dados tomográficos e prontuários, bem como das medidas de segurança adotadas para garantir o sigilo, a confidencialidade e a anonimização das informações sensíveis dos participantes. As informações foram inseridas tanto nos campos correspondentes da Plataforma Brasil quanto nos documentos atualizados, em conformidade com as orientações deste Comitê.

Diante do exposto, considera-se que todas as pendências éticas anteriormente apontadas foram devidamente sanadas, estando o protocolo em conformidade com os princípios éticos estabelecidos nas Resoluções CNS nº 466/2012, nº 510/2016 e na Norma Operacional CNS nº 001/2013.

Assim, este Comitê de Ética em Pesquisa manifesta-se de forma favorável à aprovação do projeto.

#### **Considerações Finais a critério do CEP:**

Este CEP, de acordo com as atribuições definidas nas Resoluções CNS nº 466/2012 e 510/2016 e na Norma Operacional 001/2013 do CNS, manifesta-se pela aprovação do projeto de pesquisa proposto. O(A) pesquisador(a) deve atentar-se que a aprovação por este CEP refere-se à apreciação do protocolo submetido para avaliação. Havendo a necessidade de alterações no projeto, o(a) pesquisador(a) deve submeter emenda via Plataforma Brasil a este CEP.

#### **Este parecer foi elaborado baseado nos documentos abaixo relacionados:**

| Tipo Documento                 | Arquivo                                       | Postagem               | Autor                 | Situação |
|--------------------------------|-----------------------------------------------|------------------------|-----------------------|----------|
| Informações Básicas do Projeto | PB_INFORMAÇÕES_BÁSICAS_DO_PROJETO_2560738.pdf | 19/12/2025<br>18:30:37 |                       | Aceito   |
| Outros                         | Carta_respostapb.docx                         | 19/12/2025<br>18:30:18 | ULISSES<br>SIMONCELLI | Aceito   |

**Endereço:** Rua Waldemar Blatkauskas, 72

**Bairro:** Swift

**CEP:** 13.041-545

**UF:** SP

**Município:** CAMPINAS

**Telefone:** (19)3211-3601

**E-mail:** cep@slmandic.edu.br

FACULDADE SÃO LEOPOLDO  
MANDIC

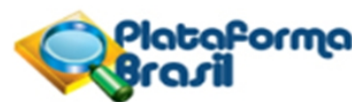

Continuação do Parecer: 8.163.308

|                                                                    |                              |                        |                       |        |
|--------------------------------------------------------------------|------------------------------|------------------------|-----------------------|--------|
| Outros                                                             | Projeto_ulisses.docx         | 19/12/2025<br>18:28:35 | ULISSES<br>SIMONCELLI | Aceito |
| Projeto Detalhado /<br>Brochura<br>Investigador                    | Projeto_ulisses_srealce.docx | 19/12/2025<br>18:28:10 | ULISSES<br>SIMONCELLI | Aceito |
| Folha de Rosto                                                     | folha_de_rosto5.pdf          | 19/12/2025<br>11:12:50 | ULISSES<br>SIMONCELLI | Aceito |
| TCLE / Termos de<br>Assentimento /<br>Justificativa de<br>Ausência | TCLESLM.pdf                  | 14/10/2025<br>11:32:07 | ULISSES<br>SIMONCELLI | Aceito |
| Outros                                                             | cracha.jpeg                  | 14/10/2025<br>11:27:46 | ULISSES<br>SIMONCELLI | Aceito |
| Outros                                                             | acervo.pdf                   | 14/10/2025<br>11:21:29 | ULISSES<br>SIMONCELLI | Aceito |

**Situação do Parecer:**

Aprovado

**Necessita Apreciação da CONEP:**

Não

CAMPINAS, 10 de Fevereiro de 2026

---

**Assinado por:**  
**Flávia Lucisano Botelho do Amaral**  
**(Coordenador(a))**

**Endereço:** Rua Waldemar Blatkauskas, 72

**Bairro:** Swift

**UF:** SP

**Município:** CAMPINAS

**CEP:** 13.041-545

**Telefone:** (19)3211-3601

**E-mail:** cep@slmandic.edu.br
