# Supplementary material
Source: Research Square preprint supplement (doi:10.21203/rs.3.rs-9200599/v1)
Supplement: Supplementary file 2 [file d5a2d2046b9f9d627491f419.docx]

| **Table 1.** Distribution of the 25 participants according to sex and presence of mandibular midline deviation. | |
| --- | --- |
| Characteristics | **n (%)** |
| *Sex* | |
| Female | 14 (56,0) |
| Male | 11 (44,0) |
| *Mandibular midline deviation* | |
| No deviation | 6 (24,0) |
| Deviation to the right | 10 (40,0) |
| Deviation to the left | 9 (36,0) |
|  | |

| **Table 2**. Tomographic measurements grouped by condylar volume, axial, coronal, and sagittal planes, and mandibular midline deviation | |
| --- | --- |
| Measurements |  |
| Condylar volume (mm³) | |
| Condylar volume – right | |
| Mean (±SD) | 1739,97 (±335,26) |
| Median (Q1 – Q3) | 1722,89 (1416,89 – 1986,67) |
| Condylar volume – left | |
| Mean (±SD) | 1685,79 (±373,36) |
| Median (Q1 – Q3) | 1642,36 (1426,02 – 1906,38) |
| ***Axial plane (mm)*** | |
| Midline to coronoid process – right | |
| Mean (±SD) | 48,36 (± 2,78) |
| Median (Q1 – Q3) | 48,40 (46,30 – 49,50) |
| Midline to coronoid process – left | |
| Mean (±SD) | 47,95 (±3,35) |
| Median (Q1 – Q3) | 48,00 (45,90 – 50,50) |
| Condylar width – right | |
| Mean (±SD) | 18,73 (±1,94) |
| Median (Q1 – Q3) | 18,80 (17,40 – 20,30) |
| Condylar width – left | |
| Mean (±SD) | 18,24 (±1,89) |
| Median (Q1 – Q3) | 18,20 (17,0 – 19,80) |
| Intercondylar angle (°) | |
| Mean (±SD) | 141,61 (±16,68) |
| Median (Q1 – Q3) | 139,50 (130,40 - 153,40) |
| ***Coronal plane (mm)*** | |
| **Lateral pole to midline – right** | |
| Mean (±SD) | 57,29 (±2,85) |
| Median (Q1 – Q3) | 57,60 (54,60 – 59,00) |
| **Lateral pole to midline – left** | |
| Mean (±SD) | 56,14 (±3,05) |
| Median (Q1 – Q3) | 55,60 (53,80 – 57,40) |
| **Condylar head to Frankfurt horizontal plane – right** | |
| Mean (±SD) | 2,24 (±0,96) |
| Median (Q1 – Q3) | 2,20 (1,60 – 3,00) |
| **Condylar head to Frankfurt horizontal plane – left** | |
| Mean (±SD) | 2,51 (±0,97) |
| Median (Q1 – Q3) | 2,70 (1,80 – 3,20) |
| ***Sagital plane (mm)*** | |
| Vertical line to coronoid process – right | |
| Mean (±SD) | 37,35 (±2,90) |
| Median (Q1 – Q3) | 38,10 (36,60 – 39,50) |
| Vertical line to coronoid process – left | |
| Mean (±SD) | 37,67 (±3,52) |
| Median (Q1 – Q3) | 38,70 (35,60 – 40,00) |
| Vertical line to gonion – right | |
| Mean (±SD) | 15,36 (±3,90) |
| Median (Q1 – Q3) | 15,20 (12,40 – 17,80) |
| Vertical line to gonion – left | |
| Mean (±SD) | 15,64 (±4,63) |
| Median (Q1 – Q3) | 15,30 (11,90 – 18,90) |
| Frankfurt horizontal plane to coronoid process – right | |
| Mean (±SD) | 6,25 (±3,79) |
| Median (Q1 – Q3) | 6,30 (4,20 – 9,20) |
| Frankfurt horizontal plane to coronoid process – left | |
| Mean (±SD) | 6,55 (±4,47) |
| Median (Q1 – Q3) | 7,20 (5,20 – 10,00) |
| Frankfurt horizontal plane to gonion – right | |
| Mean (±SD) | 61,91 (±6,32) |
| Median (Q1 – Q3) | 62,10 (56,30 – 65,30) |
| Frankfurt horizontal plane to gonion – left | |
| Mean (±SD) | 62,45 (±7,55) |
| Median (Q1 – Q3) | 61,40 (56,30 – 66,10) |
| Mandibular midline deviation (mm) | |
| Mean (±SD) | 2,67 (±1,83) |
| Median (Q1 – Q3) | 1,80 (1,20 – 4,15) |
| SD = standard deviation. Q1 = first quartile. Q3 = third quartile. | |

| Table 3. Tomographic measurements grouped by condylar volume, axial, coronal, and sagittal planes, and mandibular midline deviation according to participants’ sex. | | | |
| --- | --- | --- | --- |
| **Measurements** | **Sex** | | p-value* |
| **Female** | **Male** |
| Condylar volume (mm³) | | | |
| Condylar volume – rigth side | | | |
| Mean (±SD) | 1608,51 (±275,74) | 1907,27 (±340,49) | 0,023 |
| Median (Q1 – Q3) | 1595,54 (1349,73 – 1851,82) | 1867,41 (1639,75 – 2095,48) |
| Condylar volume – left side | | | |
| Mean (±SD) | 1541,56 (±282,63) | 1869,35 (±405,61) | 0,026 |
| Median (Q1 – Q3) | 1570,72 (1319,99 – 1730,94) | 1787,15 (1582,95 – 2112,31) |
| ***Axial*** | | | |
| Midline to coronoid process – right side | | | |
| Mean (±SD) | 48,09 (±3,35) | 48,71 (±1,92) | 0,588 |
| Median (Q1 – Q3) | 48,40 (46,08 – 49,15) | 48,40 (47,75 – 49,55) |
| Midline to coronoid process – left side | | | |
| Mean (±SD) | 47,44 (±3,96) | 48,60 (±2,37) | 0,402 |
| Median (Q1 – Q3) | 46,80 (45,10 – 50,70) | 48,40 (47,70 - 49,85) |
| Condylar width – right side | | | |
| Mean (±SD) | 17,94 (±1,88) | 19,73 (±1,58) | 0,019 |
| Median (Q1 – Q3) | 18,10 (16,92 – 18,70) | 20,30 (19,60 – 20,50) |
| Condylar width – left side | | | |
| Mean (±SD) | 17,72 (±2,00) | 18,91 (±1,57) | 0,120 |
| Median (Q1 – Q3) | 17,15 (16,47 – 19,55) | 19,10 (18,05 – 19,70) |
| Intercondylar angle (°) | | | |
| Mean (±SD) | 145,29 (±19,76) | 136,93 (±10,80) | 0,220 |
| Median (Q1 – Q3) | 145,00 (131,32 – 163,90) | 134,80 (128,70 – 141,45) |
| ***Coronal*** | | | |
| Lateral pole to midline – right side | | | |
| Mean (±SD) | 56,45 (±3,24) | 58,35 (±1,91) | 0,098 |
| Median (Q1 – Q3) | 56,15 (54,35 – 58,28) | 58,10 (57,65 – 59,75) |
| Lateral pole to midline – left side | | | |
| Mean (±SD) | 55,65 (±3,32) | 56,77 (±2,69) | 0,372 |
| Median (Q1 – Q3) | 54,95 (53,85 – 56,57) | 56,90 (54,90 – 58,15) |
| Condylar head to Frankfurt plane – right side | | | |
| Mean (±SD) | 2,21 (±0,70) | 2,27 (±1,25) | 0,870 |
| Median (Q1 – Q3) | 2,05 (1,72 – 2,90) | 2,20 (1,55 – 3,15) |
| Condylar head to Frankfurt plane – left side | | | |
| Mean (±SD) | 2,60 (±0,67) | 2,39 (±1,29) | 0,605 |
| Median (Q1 – Q3) | 2,75 (2,25 – 3,00) | 2,60 (1,80 – 3,35) |
| ***Sagittal*** | | | |
| Vertical line to coronoid process – right side | | | |
| Mean (±SD) | 37,17 (±3,43) | 37,58 (±2,20) | 0,734 |
| Median (Q1 – Q3) | 37,95 (35,48 – 40,03) | 38,10 (36,70 – 39,10) |
| Vertical line to coronoid process – left side | | | |
| Mean (±SD) | 37,61 (±3,78) | 37,75 (±3,35) | 0,929 |
| Median (Q1 – Q3) | 39,25 (34,10 – 40,22) | 38,00 (36,60 – 39,40) |
| Vertical line to gonion – right side | | | |
| Mean (±SD) | 14,57 (±3,35) | 16,36 (±4,47) | 0,263 |
| Median (Q1 – Q3) | 14,15 (12,63 – 15,90) | 16,30 (12,35 – 20,20) |
| Vertical line to gonion – leftt side | | | |
| Mean (±SD) | 14,80 (±4,13) | 16,71 (±5,20) | 0,316 |
| Median (Q1 – Q3) | 14,60 (13,63 – 17,00) | 17,30 (11,90 – 20,25) |
| Frankfurt plane to coronoid process – right side | | | |
| Mean (±SD) | 5,82 (±3,62) | 6,79 (±4,11) | 0,537 |
| Median (Q1 – Q3) | 4,70 (4,20 – 8,35) | 8,10 (4,60 - 9,2) |
| Frankfurt plane to coronoid process – left side | | | |
| Mean (±SD) | 6,00 (±4,14) | 7,25 (±4,98) | 0,498 |
| Median (Q1 – Q3) | 6,55 (5,23 – 8,35) | 8,80 (4,50 – 10,55) |
| Frankfurt plane to gonion – right side | | | |
| Mean (±SD) | 58,27 (±4,39) | 66,54 (±5.36) | < 0,001 |
| Median (Q1 – Q3) | 57,75 (55,02 – 62,40) | 67,60 (62,75 – 71,40) |
| Frankfurt plane to gonion – left side | | | |
| Mean (±SD) | 58,69 (±4,23) | 67,24 (±8,29) | 0,003 |
| Median (Q1 – Q3) | 56,60 (55,90 – 61,40) | 66,90 (61,65 – 69,20) |
| Mandibular midline deviation (mm) | | | |
| Mean (±SD) | 2,29 (±1,63) | 3,09 (±2,04) | 0,357 |
| Median (Q1 – Q3) | 1,55 (1,20 – 3,17) | 1,90 (1,60 – 5,20) |
| **SD = standard deviation; Q1 = first quartile; Q3 = third quartile.** **p-value obtained using Student’s t-test - Analysis restricted to participants with mandibular midline deviation (n = 19; 10 females and 9 males).** | | | |

| Table 4. Tomographic measurements grouped by condylar volume, axial, coronal, and sagittal planes, and mandibular midline deviation according to the presence and side of midline deviation. | | | | |
| --- | --- | --- | --- | --- |
| Measurements | Midline Deviation | | | p-value* |
| **Right** | **Left** | **No Deviation** |
| Condylar volume (mm³) | | | |  |
| Condylar volume - right | | | |  |
| Mean (±SD) | 1777,55 (±376,17) | 1693,52 (±295,13) | 1747,00 (±372,38) | 0,870 |
| Median (Q1 – Q3) | 1685,02 (1547,67 –1990,72) | 1720,65 (1416,89 – 1986,67) | 1846,12 (1499,47 – 1862,30) |
| Condylar volume - left | |  |  |  |
| Mean (±SD) | 1728,46 (±471,97) | 1654,09 (±320,43) | 1662,2 (±312,65) | 0,904 |
| Median (Q1 – Q3) | 1641,74 (1379,61 – 1906,08) | 1664,26 (1480,61 – 1889,04) | 1607,80 (1466,65 – 1836,54) |
| ***Axial*** | | | |  |
| Midline to coronoid process – right side | | | |  |
| Mean (±SD) | 48,94 (±1,85) | 49,08 (±3,12) | 46,32 (±2,94) | 0,115 |
| Median (Q1 – Q3) | 48,80 (47,95 – 49,00) | 49,20 (46,30 – 50,80) | 46,85 (45,33 – 48,15) |
| Midline to coronoid process – left side | | | |  |
| Mean (±SD) | 48,16 (±2,62) | 48,87 (±3,61) | 46,23 (±3,93) | 0,331 |
| Median (Q1 – Q3) | 47,85 (46,70 – 50,13) | 48,4 (46,00 – 52,10) | 46,65 (42,90 – 48,75) |
| Condylar width – right side | | | |  |
| Média (±DP) | 18,77 (±2,24) | 18,91 (±1,66) | 18,38 (±2,11) | 0,881 |
| Mediana (Q1 – Q3) | 19,30 (17,47 – 20,38) | 19,30 (18,20 – 19,90) | 18,40 (17,17 – 20,15) |
| Condylar width – left side | | | |  |
| Mean (±SD) | 18,79 (±1,93) | 17,79 (±1,74) | 18,02 (±2,12) | 0,504 |
| Median (Q1 – Q3) | 19,10 (17,52 – 20,03) | 17,20 (16,70 – 18,50) | 18,05 (16,55 – 19,77) |
| Intercondylar angle (°) | | | |  |
| Mean (±SD) | 140,04 (±19,64) | 144,80 (±14,63) | 139,45 (±16,39) | 0,786 |
| Median (Q1 – Q3) | 137,50 (127,45 – 156,35) | 139,50 (133,40 – 153,40) | 137,45 (131,95 – 140,17) |
| ***Coronal*** | | | |  |
| Lateral pole to midline – right side | | | |  |
| Mean (±SD) | 57,02 (±2,78) | 58,23 (±2,93) | 56,32 (±2,90) | 0,429 |
| Median (Q1 – Q3) | 56,95 (54,85 – 59,22) | 57,90 (57,60 – 58,80) | 56,15 (54,83 – 57,70) |
| Lateral pole to midline – left side | | | |  |
| Mean (±SD) | 56,01 (±2,74) | 56,78 (±3,72) | 55,42 (±2,77) | 0,706 |
| Median (Q1 – Q3) | 56,20 (53,65 – 57,53) | 55,50 (54,80 – 56,90) | 55,70 (53,45 – 57,27) |
| Condylar head to Frankfurt plane – right side | | | |  |
| Mean (±SD) | 2,41 (±1,02) | 2,14 (±1,05) | 2,08 (±0,84) | 0,771 |
| Median (Q1 – Q3) | 2,40 (1,65 – 2,98) | 2,20 (1,70 – 3,00) | 1,85 (1,57 – 2,73) |
| Condylar head to Frankfurt plane – leftt side | | | |  |
| Mean (±SD) | 2,63 (±1,02) | 1,92 (±0,93) | 3,18 (±0,34) | 0,035 |
| Median (Q1 – Q3) | 2,70 (1,95 – 3,15) | 2,00 (1,80 – 2,60) | 3,35 (2,92 – 3,40) |
| ***Sagittal*** | | | |  |
| Vertical line to coronoid process – right side | | | |  |
| Mean (±SD) | 37,62 (±3,14) | 36,14 (±3,15) | 38,72 (±1,35) | 0,234 |
| Median (Q1 – Q3) | 38,25 (36,65 – 39,50) | 35,10 (34,20 – 38,70) | 38,65 (37,95 – 39,88) |
| Vertical line to coronoid process – left side | | | |  |
| Mean (±SD) | 38,87 (±2,97) | 35,3 (±3,89) | 39,23 (±1,88) | 0,033 |
| Median (Q1 – Q3) | 39,40 (37,88 – 40,92) | 35,00 (32,30 – 38,00) | 39,60 (38,40 – 40,20) |
| Vertical line to gonion – right side | | | |  |
| Mean (±SD) | 14,16 (±3,12) | 14,59 (±3,67) | 18,52 (±4,26) | 0,067 |
| Median (Q1 – Q3) | 13,55 (12,33 – 16,03) | 13,90 (12,30 – 16,10) | 18,80 (15,68 – 22,00) |
| Vertical line to gonion – left side | | | |  |
| Mean (±SD) | 15,54 (±3,54) | 13,06 (±4,15) | 19,68 (±4,59) | 0,018 |
| Median (Q1 – Q3) | 16,05 (13,63 – 18,50) | 11,90 (10,80 – 15,30) | 20,55 (15,95 – 23,73) |
| Frankfurt plane to coronoid process – right side | | | |  |
| Mean (±SD) | 4,95 (±3,48) | 6,73 (±4,66) | 7,68 (±2,49) | 0,351 |
| Median (Q1 – Q3) | 4,65 (4,20 – 6,55) | 6,30 (4,30 – 10,80) | 8,40 (7,50 – 8,78) |
| Frankfurt plane to coronoid process – left side | | | |  |
| Mean (±SD) | 5,61 (±4,52) | 6,28 (±5,61) | 8,53 (±1,49) | 0,456 |
| Median (Q1 – Q3) | 5,85 (3,17 – 9,22) | 7,20 (5,30 – 10,00) | 8,65 (7,68 – 9,32) |
| Frankfurt plane to gonion – right side | | | |  |
| Mean (±SD) | 62,08 (±6,99) | 62,56 (±5,96) | 60,65 (±6,65) | 0,885 |
| Median (Q1 – Q3) | 62,70 (56,10 – 66,95) | 63,20 (59,00 – 65,30) | 59,70 (55,58 – 62,10) |
| Frankfurt plane to gonion – left side | | | |  |
| Mean (±SD) | 63,48 (±10,87) | 63,29 (±4,21) | 59,48 (±4,33) | 0,563 |
| Median (Q1 – Q3) | 61,10 (56,15 – 67,95) | 61,90 (61,30 – 66,10) | 58,55 (56,15 – 61,10) |
| Mandibular midline deviation (mm)** | | | | |
| Mean (±SD) | 2,28 (±1,64) | 3,10 (±2,03) | - | 0,513† |
| Median (Q1 – Q3) | 1,65 (1,22 – 2,55) | 3,30 (1,00 – 5,20) | - |
| SD = standard deviation. Q1 = first quartile. Q3 = third quartile. *p-value obtained using ANOVA. ****Analysis restricted to participants with mandibular midline deviation (n = 19; 10 right-sided and 9 left-sided). †p-value obtained using the Mann–Whitney U test.** | | | | |
